# Supplementary material
Source: PubMed Central journal article supplement (PMC3258871)

## Supplementary materials

**Table SI** PCR primers for ChIP assay shown in Fig.3A

**Figure S1** The effects of IL-4 on *Foxp3* levels in CD4<sup>+</sup>CD25<sup>+</sup> nTregs and iTregs. Sorted CD4<sup>+</sup>CD25<sup>+</sup> nTregs and *in-vitro*-differentiated iTregs were cultured under the Th0 conditions in the presence or absence of IL-4 for 12 h. After incubation, *Foxp3* mRNA levels were determined by real-time PCR and expressed as fold change to untreated cells defined as 1.0. Fold change are shown as the mean  $\pm$  SD of three experiments. \*,  $p < 0.05$ .

**Figure S2** (A) Time course of *Foxp3* mRNA (left) and *GATA3* mRNA (right) induction by anti-TCR Ab in the presence or absence of TGF- $\beta$ 1. Naïve T cells were cultured under the iTreg condition in the presence or absence of IL-4 for the indicated period. *Foxp3* and *GATA3* levels were determined by real-time PCR. Data shows mean  $\pm$  SD of triplicate samples in one representative experiment out of three experiments. \*,  $p < 0.01$ . (B) IL-4 did not affect TGF- $\beta$ 1-induced Smad2 activation. Naïve T cells were cultured with IL-4 for 15 min and then stimulated with TGF- $\beta$ 1 for indicated periods. The cell lysate was subjected to Western blotting with indicated antibodies.

**Figure S3** Stably expression of Foxp3 in EL4 cells. The empty MIGR1 plasmid and Foxp3-IRES-GFP-MIGR1 plasmid were transfected into a packaging cell line, 293GPG. EL4 cells were retrovirally transduced with the virus supernatants. Naïve T cells were cultured under the Th0 or iTreg conditions for 3 days. Cells were stained with anti-Foxp3 antibody and analyzed by a flow cytometry.

| PCR product | primer sequence (5'-3')             |                                    |
|-------------|-------------------------------------|------------------------------------|
|             | Forward                             | Reverse                            |
| 1           | cta gaa acc atg ctg caa aga c       | gta ctc att ttc tca ggg tcc atg g  |
| 2           | cgc agc tgc cag atc ttg aat ac      | cac tcc cgt ttg caa agg ttt agg    |
| 3           | gcc cca agc aac ctt aaa ctc ttg     | ctg tta tag cag cca gca tca cc     |
| 4           | ggg cac tca gca caa aca tga tg      | gag gct tcc ttc tgc tcc aaa c      |
| 5           | cct ttt acc tct gtg gtg agg g       | tat acc gag aag aaa aac cac ggc g  |
| 6           | gat aat gtg gca gtt tcc cac aag c   | ttt ttg ccc ctg tct aag gac caa c  |
| 7           | gtc tat caa ctg ctg gtc tcc ag      | gtg caa aag cag ctg aag gaa gat g  |
| 8           | gcc ctc tct aca aat tgc ttt tcc a   | cat gca gga aga aca tgc atg ctc    |
| 9           | cca gaa gat ggt gtg gga tct c       | cag tga gtt tta ggc cag tca gg     |
| 10          | cag gct gac ctc aaa ctc aca aag     | cat acc cac act ttt gac ctc tgc    |
| 11          | gtg ggc tat cta cgc agt cac tt      | gag aca gtg aga gca gtt tag agg    |
| 12          | ctc cat aag att tac ccc agc cac     | cat gct atg gtt atg gac tgg atc c  |
| 13          | ctc ttg tcc ctg tata ctg gaa gaa tg | cag agg att gga aaa ccc tct act g  |
| 14          | ctc tgt cat aat gga gct cag gac     | ggg tgg atg ctt ggt gag tct tag g  |
| 15          | caa tat cca tga ggc ctg cct aat ac  | ctt ggc cag att ttt ctg cca ttg ac |
| 16          | cta ctc acc aaa cct gat ccg cat     | ggg att aag act agt gtg tca cgg g  |
| 17          | tct ctc aac tct gat aag ccc cag     | ggg ttt ctt gta gtc tgg aac tcc    |
| 18          | gtc cca ggc cat gag aag act a       | gga tag ggt tgc ttg att gag gg     |
| 19          | cca cgc caa ttc caa gac aga ag      | tga ctg tct tcc aag tct cgt ctg    |

Takaki et. al., Table S1

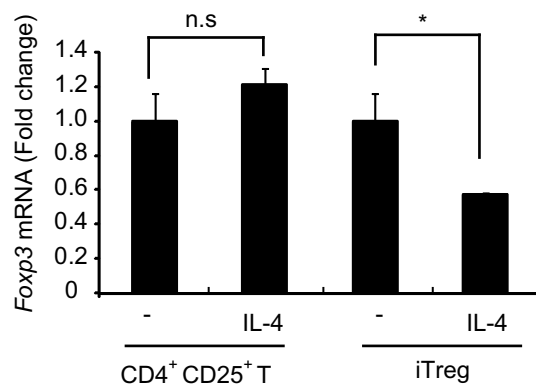

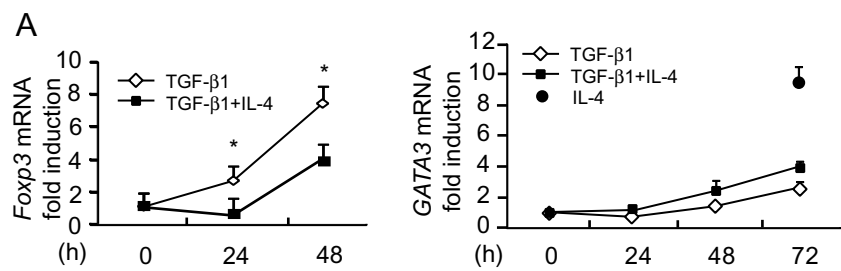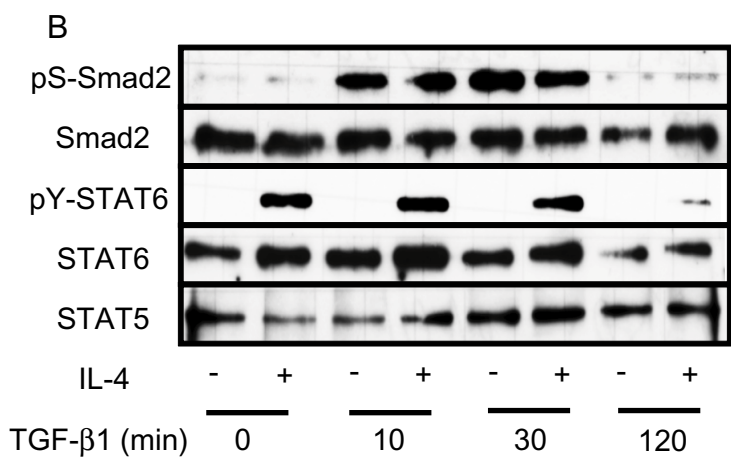

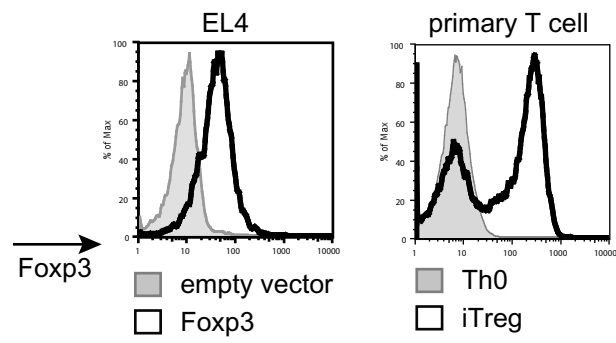

Supplement: M801123200_1.pdf [file M801123200_1.pdf]
